# Supplementary material
Source: PubMed Central journal article supplement (PMC6446708)
Supplement: 10.1194_M091173_jlr.M091173-1.pdf [file 10.1194_M091173_jlr.M091173-1.pdf]

**SUPPLEMENTAL INFORMATION:**

**Rosiglitazone remodels the lipid droplets and britens human visceral and subcutaneous adipocytes ex vivo**

Mi-Jeong Lee<sup>1,2,\*</sup>, Sukanta Jash<sup>2,3</sup>, Jessica E. C. Jones<sup>4</sup>, Vishwajeet Puri<sup>2,3</sup>, and Susan K. Fried<sup>1,2</sup>

<sup>1</sup>Diabetes, Obesity and Metabolism Institute, Icahn School of Medicine at Mount Sinai, New York 10029; <sup>2</sup>Obesity Center, Department of Medicine, Boston University School of Medicine, Boston, MA 02118; <sup>3</sup>Department of Biomedical Sciences and Diabetes Institute, Heritage College of Osteopathic Medicine, Ohio University, Athens, Ohio 45701; <sup>4</sup>Department of Biochemistry, Boston University School of Medicine, Boston, MA

**Supplemental Table S1. Characteristics of subjects**

| ID | Procedure          | Age<br>(years) | Sex | Race | BMI<br>(kg/m <sup>2</sup> ) | Meds                |
|----|--------------------|----------------|-----|------|-----------------------------|---------------------|
| 1  | Ovarian cystectomy | 35             | F   | AA   | 25.0                        |                     |
| 2  | TAH laproscopic    | 46             | F   | H    | 27.0                        |                     |
| 3  | Gastric Bypass     | 47             | F   | AA   | 51.0                        | Simvastatin         |
| 4  | TAH laproscopic    | 39             | F   | H    | 31.0                        |                     |
| 5  | Hysteroscopy       | 31             | F   | H    | 29.0                        |                     |
| 6  | TAH laproscopic    | 48             | F   | H    | 23.0                        | Simvastatin         |
| 7  | Gastric Bypass     | 31             | M   | H    | 63.0                        |                     |
| 8  | Panniculectomy     | 27             | F   | AA   | 29.0                        |                     |
| 9  | Gastric Bypass     | 31             | F   | AA   | 49.0                        |                     |
| 10 | Gastric Bypass     | 64             | F   | C    | 44.9                        | Synthroid           |
| 11 | Panniculectomy     | 31             | F   | AA   | 24.0                        |                     |
| 12 | Gastric Bypass     | 28             | F   | AA   | 37.5                        |                     |
| 13 | Gastric Bypass     | 62             | M   | C    | 36.0                        | Lipitor             |
| 14 | Gastric Bypass     | 45             | F   | C    | 39.0                        |                     |
| 15 | Gastric Bypass     | 33             | F   | H    | 43.0                        |                     |
| 16 | Gastric Bypass     | 29             | F   | H    | 45.0                        | Metformin           |
| 17 | Nephrectomy donor  | 50             | F   | C    | 23.0                        |                     |
| 18 | Gastric Bypass     | 25             | M   | H    | 55.8                        |                     |
| 19 | Gastric Bypass     | 31             | F   | H    | 51.7                        | Simvastatin         |
| 20 | Gastric Bypass     | 33             | F   | C    | 45.8                        |                     |
| 21 | Gastric Bypass     | 27             | F   | C    | 39.7                        | Levothyroxine       |
| 22 | Sleeve Gastrectomy | 45             | M   | AA   | 52.4                        |                     |
| 23 | Sleeve Gastrectomy | 30             | F   | AA   | 56.1                        | Albuterol, Nystatin |
| 24 | Gastric Bypass     | 46             | M   | H    | 45.8                        |                     |
| 25 | Sleeve Gastrectomy | 42             | M   | C    | 42.1                        |                     |
| 26 | Sleeve Gastrectomy | 29             | F   | C    | 40.3                        |                     |
| 27 | Sleeve Gastrectomy | 38             | F   | C    | 41.5                        |                     |
| 28 | Gastric Bypass     | 39             | F   | C    | 42.0                        |                     |
| 29 | Gastric Bypass     | 42             | F   | H    | 46.3                        |                     |
| 30 | Panniculectomy     | 47             | F   | H    | 45.7                        |                     |
| 31 | Sleeve Gastrectomy | 31             | F   | C    | 38.1                        |                     |
| 32 | Gastric Bypass     | 45             | F   | C    | 42.1                        |                     |
| 33 | Gastric Bypass     | 31             | F   | C    | 42.1                        |                     |
| 34 | Abdominoplasty     | 53             | F   | AA   | 33.5                        |                     |
| 35 | TAH laproscopic    | 59             | F   | C    | 31.0                        |                     |
| 36 | TAH laproscopic    | 62             | F   | C    | 31.4                        |                     |
| 37 | Gastric Bypass     | 57             | F   | C    | 53.8                        |                     |
| 38 | TAH laproscopic    | 53             | F   | AA   | 53.3                        |                     |
| 39 | Abdominoplasty     | 71             | F   | C    | 29.0                        | Synthroid           |

BMI, Body Mass Index; TAH, total abdominal hysterectomy; AA, African American; C, Caucasian; H, Hispanic

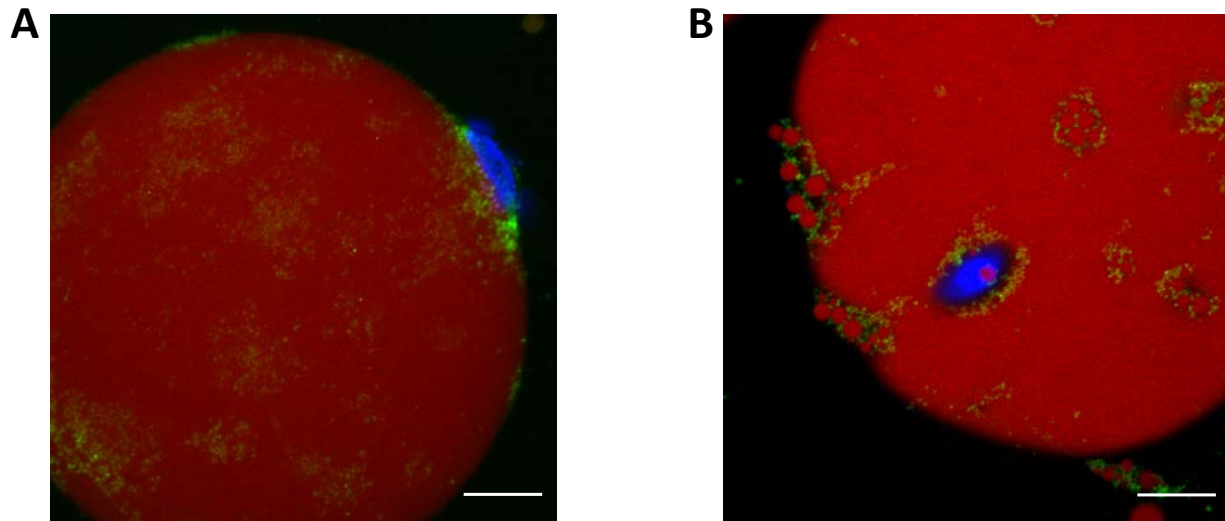

**Supplemental Figure S1. Remodeling of lipid droplets and rearrangement of mitochondria in rosi-britened human adipocytes isolated from cultured abdominal subcutaneous adipose tissues.**

Isolated adipocytes from abdominal subcutaneous adipose tissues that were cultured with or without rosi for 7d were used for confocal imaging after staining with LipidTOX-Deep Red, Mitotracker-Green and DAPI. Adipocytes isolated from control (A) and rosi-treated (B) adipose tissues. White bars = 10 micrometers.

**A KEGG pathways associated with transcripts induced by Rosi (FDR < 0.05)**

| Term ID  | Term                      | Genes in terms | P Value  | Genes                                                                                                                                                            |
|----------|---------------------------|----------------|----------|------------------------------------------------------------------------------------------------------------------------------------------------------------------|
| hsa01100 | Metabolic pathway         | 114            | 6.24E-11 | <i>AGPAT3, AGK, MLYCD, HK2, MOGAT3, MGLL, PEMT, ACAT1, RDH10, ACAA1, ACAA2, ACADS, ACADM, ACADVL, CTP1A, CPT2, EHHADH, HADH, ACACA, ACSL3, ACSL4, MECR, TECR</i> |
| hsa00071 | Fatty acid degradation    | 15             | 2.25E-08 | <i>ACAT1, ACAA1, ACAA2, ACADS, ACADM, ACADVL, CTP1A, CPT2, EHHADH, HADH</i>                                                                                      |
| hsa00190 | Oxidative phosphorylation | 24             | 2.68E-07 | <i>ATP5B, ATP5F1, ATP5C1, NDUFS2, NDUFS7, NDUFS8, SDHB, COX7B, COX11, UQCRC2</i>                                                                                 |
| hsa00280 | BCAA degradation          | 14             | 4.55E-07 | <i>HMGCS1, HIBCH, ACAT1, ACAA1, ACADS, ACADM</i>                                                                                                                 |
| hsa03320 | PPAR signaling pathway    | 14             | 3.18E-05 | <i>UCP1, FABP3, ACAA1, ACADM, ACSL3, ACSL4, CPT1A, CPT2, PLTP</i>                                                                                                |
| hsa00062 | Fatty acid elongation     | 8              | 2.05E-04 | <i>ELOVL3, SLC27A3, ACACA, ACOT4, MECR, TECR</i>                                                                                                                 |
| hsa03010 | Ribosome                  | 18             | 6.32E-04 | <i>RPL3, RPL9, MRPS2, MRPS9, MRPS11</i>                                                                                                                          |
| hsa04146 | Peroxisome                | 13             | 1.10E-03 | <i>PHYH, EHHADH, AGPS, CRAT, CAT, FAR2, PEX3, MLYCD</i>                                                                                                          |

**B KEGG pathways associated with transcripts suppressed by Rosi (FDR < 0.05)**

| Term ID  | Term                                   | Genes in terms | P Value  | Genes                                                                           |
|----------|----------------------------------------|----------------|----------|---------------------------------------------------------------------------------|
| hsa04060 | Cytokine-cytokine receptor interaction | 33             | 2.96E-08 | <i>LEP, TNF, CCL2, CCL1, CCL11, CCR1, CCR3, IL1R1, IL6R, TGFB3, TGFB2, SAA1</i> |
| hsa04062 | Chemokine signaling pathway            | 23             | 6.28E-05 | <i>CCL2, CCL1, CCL11, CCR1, CCR3</i>                                            |
| hsa04510 | Focal adhesion                         | 23             | 2.83E-04 | <i>CAV1, CCND1, COL1A1, COL3A1, HGF, FGF, IGF1, ITGA5, PGF</i>                  |
| hsa04610 | Complement and coagulation cascades    | 12             | 3.58E-04 | <i>F13A1, A2M, C1QA, C1QC, C3, C7, CFB</i>                                      |
| hsa04640 | Hematopoietic cell lineage             | 12             | 2.13E-03 | <i>CD3, CD14, IL1R1, IL6R1, TNF</i>                                             |
| hsa04064 | NF-kappa B signaling pathway           | 12             | 2.57E-03 | <i>CCL19, CCL21, NFKBIA, ICAM1, TRAK4, TNFSF14</i>                              |

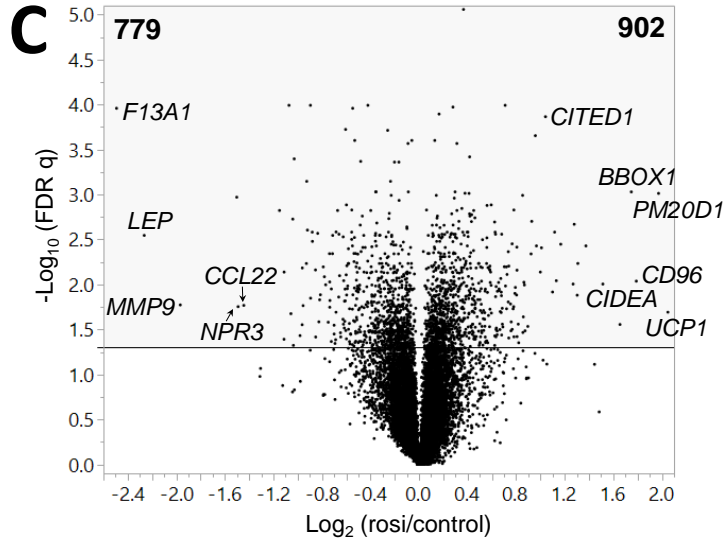

**Supplemental Figure S2. Rosi-mediated regulation of omental human adipose tissue gene expression.**

After treating with omental adipose tissues with or without rosi (1  $\mu\text{M}$ ) for 7 days, RNA was purified for microarray and differential mRNA expression between control and rosi treated samples were determined. (A) Up- or (B) down-regulated genes were subjected to functional categorization using DAVID and significantly enriched ( $p < 0.01$ ) pathways extracted from the KEGG database are displayed. (C)  $\text{Log}_2$  fold changes in the rosi-treated vs. control samples and the corresponding significance values presented as  $\text{log}_{10}(\text{FDR}q)$ . The grey line indicates the cutoff values for  $\text{FDR}q < 0.05$ . In total, 902 (right) and 777 (left) genes were identified that had been induced or suppressed by rosi treatment, respectively. The most significantly affected genes are labelled.
